# Supplementary material for: Keywords reflecting sepsis presentation based on mode of emergency department arrival: a retrospective cross-sectional study
Source: Springer Nature journal article supplement (doi:10.1186/s12245-021-00396-z), 2021-12-01
Supplement: MOESM1 [file 19969628]

## **Additional file 1. Definition of severe sepsis**

Severe sepsis was defined as fulfillment of one or more of the following criteria in the ED; a systolic blood pressure <90 mmHg [1], an oxygen saturation of  $\leq 86\%$  if the lung was not focus of infection or an oxygen saturation  $\leq 78\%$  if the lung was focus of infection [2], an acute altered mental status [2], mottling [1] or cardiopulmonary arrest due to sepsis (but admitted alive to in-hospital care).

### References:

1. Levy MM, Fink MP, Marshall JC, Abraham E, Angus D, Cook D, et al. 2001 SCCM/ESICM/ACCP/ATS/SIS International Sepsis Definitions Conference. *Crit Care Med.* 2003;31(4):1250-6.
2. Infektionsläkarföreningen S. Vårdprogram Svår sepsis och septisk chock -tidig identifiering och initial handläggning. 2012.
