# Supplementary material for: Keywords reflecting sepsis presentation based on mode of emergency department arrival: a retrospective cross-sectional study
Source: Springer Nature journal article supplement (doi:10.1186/s12245-021-00396-z), 2021-12-01
Supplement: MOESM2 [file 19969628]

## Additional file 2. Prevalence of primary keywords.

The prevalence of primary keywords [1] in the entire sample of septic patients presenting to the emergency department of Södersjukhuset emergency during 2013 and prevalence based on mode of arrival.

| Order | Primary keyword<br>[1]                                                                                                                                 | Prevalence               |                           |                         |                           |                             |                           | P-value*     |
|-------|--------------------------------------------------------------------------------------------------------------------------------------------------------|--------------------------|---------------------------|-------------------------|---------------------------|-----------------------------|---------------------------|--------------|
|       |                                                                                                                                                        | Entire sample<br>(N=479) |                           | EMS patients<br>(n=357) |                           | non-EMS patients<br>(n=122) |                           |              |
|       |                                                                                                                                                        | Number                   | Percent (%) and<br>95% CI | Number                  | Percent (%) and<br>95% CI | Number                      | Percent (%) and<br>95% CI |              |
| 1     | <b>Confirmed fever</b><br>Statement fever or statement<br>temperature >38°                                                                             | 271                      | 56.6 (52.1-61.0)          | 198                     | 55.5 (50.3-60.5)          | 73                          | 59.8 (51.0-68.1)          | 0.400        |
| 2     | <b>Temporal<br/>deterioration</b><br>Stated deterioration or<br>expressions describing a<br>temporal change                                            | 144                      | 30.1 (26.1-34.3)          | 102                     | 28.6 (24.1-33.5)          | 42                          | 34.4 (26.6-43.2)          | 0.223        |
| 3     | <b>Loss of energy</b><br>Defined as fatigue, weakness,<br>faintness or similar<br>expressions                                                          | 113                      | 23.6 (20.0-27.6)          | 91                      | 25.5 (21.3-30.3)          | 22                          | 18.0 (12.2-25.8)          | 0.094        |
| 4     | <b>Low blood pressure</b><br>Statement systolic blood<br>pressure ≤90 mmHg                                                                             | 113                      | 23.6 (20.0-27.6)          | 97                      | 27.2 (22.8-32.0)          | 16                          | 13.1 (8.2-20.2)           | 0.002        |
| 5     | <b>Breathing<br/>difficulties</b><br>Statement difficulties to<br>breath, dyspnea, shortness of<br>breath, shallow breathing or<br>similar expressions | 107                      | 22.3 (18.8-26.3)          | 97                      | 27.2 (22.8-32.0)          | 10                          | 8.2 (4.5-14.4)            | <b>0.000</b> |
| 6     | <b>Shivering</b>                                                                                                                                       | 96                       | 20.0 (16.7-23.9)          | 59                      | 16.5 (13.0-20.7)          | 37                          | 30.3 (22.9-39.0)          | 0.001        |
| 7     | <b>Decreased general<br/>condition</b><br>Including expressions such as<br>poor general condition,<br>affected general condition                       | 94                       | 19.6 (16.3-23.4)          | 84                      | 23.5 (19.4-28.2)          | 10                          | 8.2 (4.5-14.4)            | <b>0.000</b> |
| 8     | <b>Recent invasive<br/>procedures</b><br>Including IV drug abuse,<br>surgical and urological<br>procedures, new IV or urinary<br>catheters             | 93                       | 19.4 (16.1-23.2)          | 50                      | 14.0 (10.8-18.0)          | 43                          | 35.2 (27.3-44.1)          | <b>0.000</b> |
| 9     | <b>Abdominal pain</b>                                                                                                                                  | 92                       | 19.2 (15.9-23.0)          | 59                      | 16.5 (13.0-20.7)          | 33                          | 27.0 (20.0-35.5)          | 0.011        |

|    |                                                                                                                                     |    |                  |    |                  |    |                  |       |
|----|-------------------------------------------------------------------------------------------------------------------------------------|----|------------------|----|------------------|----|------------------|-------|
| 10 | <b>Abnormal behaviour or level of consciousness</b><br>excluding abnormal verbal response                                           | 87 | 18.2 (15.0-21.9) | 74 | 20.7 (16.9-25.2) | 13 | 10.7 (6.3-17.4)  | 0.004 |
| 11 | <b>Tachypnea</b><br>Statement tachypnea, rapid breathing, high respiratory rate, respiratory rate >20 or similar expressions        | 84 | 17.5 (14.4-21.2) | 79 | 22.1 (18.1-26.7) | 5  | 4.1 (1.8-9.2)    | 0.000 |
| 12 | <b>Abnormal verbal response</b><br>Defined as no/decreased/changed verbal response                                                  | 80 | 16.7 (13.6-20.3) | 71 | 19.9 (16.1-24.3) | 9  | 7.4 (3.9-13.4)   | 0.000 |
| 13 | <b>Abnormal micturition</b><br>Defined as haematuria without trauma, bad smelling or cloudy urine, increased frequency of urination | 76 | 15.9 (12.9-19.4) | 56 | 15.7 (12.3-19.8) | 20 | 16.4 (10.9-24.0) | 0.854 |
| 14 | <b>Tachycardia</b><br>Statement heart rate >90/min or expressions such as rapid heart rate, rapid pulse or similar expressions      | 74 | 15.5 (12.5-19.0) | 66 | 18.5 (14.8-22.9) | 8  | 6.6 (3.4-12.4)   | 0.002 |
| 15 | <b>Reduced intake of food, fluids or oral medicines</b><br>Including reduced/no appetite                                            | 73 | 15.2 (12.3-18.7) | 55 | 15.4 (12.0-19.5) | 18 | 14.8 (9.5-22.1)  | 0.863 |
| 16 | <b>Vomiting</b>                                                                                                                     | 71 | 14.8 (11.9-18.3) | 54 | 15.1 (11.8-19.2) | 17 | 13.9 (8.9-21.2)  | 0.749 |
| 17 | <b>Known ongoing or recent infection</b>                                                                                            | 66 | 13.8 (11.0-17.2) | 50 | 14.0 (10.8-18.0) | 16 | 13.1 (8.2-20.2)  | 0.805 |
| 18 | <b>Low oxygen saturation</b><br>Defined as statement oxygen saturation <90%                                                         | 65 | 13.6 (10.8-16.9) | 61 | 17.1 (13.5-21.3) | 4  | 3.3 (1.3-8.1)    | 0.000 |
| 19 | <b>Cough</b>                                                                                                                        | 57 | 11.9 (9.3-15.1)  | 41 | 11.5 (8.6-15.2)  | 16 | 13.1 (8.2-20.2)  | 0.631 |
| 20 | <b>Wounds or wound infection</b>                                                                                                    | 55 | 11.5 (8.9-14.7)  | 42 | 11.8 (8.8-15.5)  | 13 | 10.7 (6.3-17.4)  | 0.740 |
| 21 | <b>Diarrhoea</b>                                                                                                                    | 52 | 10.9 (8.4-14.0)  | 41 | 11.5 (8.6-15.2)  | 11 | 9.0 (5.1-15.4)   | 0.449 |
| 22 | <b>Current antibiotic treatment</b>                                                                                                 | 50 | 10.4 (8.0-13.5)  | 39 | 10.9 (8.1-14.6)  | 11 | 9.0 (5.1-15.4)   | 0.552 |
| 23 | <b>Airway secretions</b><br>Including expectorations, crackles and similar expressions                                              | 48 | 10.0 (7.6-13.0)  | 43 | 12.0 (9.1-15.8)  | 5  | 4.1 (1.8-9.2)    | 0.012 |

|    |                                                                                                                                                                                                                   |    |                |    |                 |    |                  |              |
|----|-------------------------------------------------------------------------------------------------------------------------------------------------------------------------------------------------------------------|----|----------------|----|-----------------|----|------------------|--------------|
| 24 | <b>Nausea</b>                                                                                                                                                                                                     | 46 | 9.6 (7.3-12.6) | 26 | 7.3 (5.0-10.5)  | 20 | 16.4 (10.9-24.0) | 0.003        |
| 25 | <b>Decreased ability to stand or walk</b><br>Including need to carry/lift the patient                                                                                                                             | 46 | 9.6 (7.3-12.6) | 35 | 9.8 (7.1-13.3)  | 11 | 9.0 (5.1-15.4)   | 0.799        |
| 26 | <b>Oedema/Swelling</b>                                                                                                                                                                                            | 44 | 9.2 (6.9-12.1) | 31 | 8.7 (6.2-12.1)  | 13 | 10.7 (6.3-17.4)  | 0.515        |
| 27 | <b>Fallen</b>                                                                                                                                                                                                     | 44 | 9.2 (6.9-12.1) | 42 | 11.8 (8.8-15.5) | 2  | 1.6 (0.5-5.8)    | 0.001        |
| 28 | <b>Substance abuse</b><br>Defined as drug abuse, alcohol overconsumption and all other terms indicating substance abuse such as "lives in a home for addicts", "patient at an outdoor clinic for substance abuse" | 43 | 9.0 (6.7-11.9) | 35 | 9.8 (7.1-13.3)  | 8  | 6.6 (3.4-12.4)   | 0.279        |
| 29 | <b>Reduced urinary volumes</b>                                                                                                                                                                                    | 38 | 7.9 (5.8-10.7) | 37 | 10.4 (7.6-14.0) | 1  | 0.8 (0.1-5.0)    | 0.001        |
| 30 | <b>Extremity pain</b>                                                                                                                                                                                             | 35 | 7.3 (5.3-10.0) | 21 | 5.9 (3.9-8.8)   | 14 | 11.5 (7.0-18.4)  | 0.040        |
| 31 | <b>Back pain</b>                                                                                                                                                                                                  | 32 | 6.7 (4.8-9.3)  | 22 | 6.2 (4.1-9.2)   | 10 | 8.2 (4.5-14.4)   | 0.437        |
| 32 | <b>Suspected fever</b><br>Defined as statement feeling hot/warm, increasing temperature or similar expressions                                                                                                    | 29 | 6.1 (4.2-8.6)  | 18 | 5.0 (3.2-7.8)   | 11 | 9.0 (5.1-15.4)   | 0.112        |
| 33 | <b>Malaise</b><br>Defined as expressions such as feeling sick, feeling bad, not feeling well and similar expressions                                                                                              | 27 | 5.6 (3.9-8.1)  | 14 | 3.9 (2.4-6.5)   | 13 | 10.7 (6.3-17.4)  | 0.005        |
| 34 | <b>Urinary tract pain</b>                                                                                                                                                                                         | 27 | 5.6 (3.9-8.1)  | 15 | 4.2 (2.6-6.8)   | 12 | 9.8 (5.7-16.4)   | 0.020        |
| 35 | <b>Compromised immune system</b><br>Chemotherapy or other immunosuppressive treatment                                                                                                                             | 26 | 5.4 (3.7-7.8)  | 19 | 5.3 (3.4-8.2)   | 7  | 5.7 (2.8-11.4)   | 0.861        |
| 36 | <b>Joint pain</b>                                                                                                                                                                                                 | 25 | 5.2 (3.6-7.6)  | 11 | 3.1 (1.7-5.4)   | 14 | 11.5 (7.0-18.4)  | <b>0.000</b> |
| 37 | <b>Undefined pain</b>                                                                                                                                                                                             | 25 | 5.2 (3.6-7.6)  | 16 | 4.5 (2.8-7.2)   | 9  | 7.4 (3.9-13.4)   | 0.215        |
| 38 | <b>Chest pain</b>                                                                                                                                                                                                 | 24 | 5.0 (3.4-7.4)  | 13 | 3.6 (2.1-6.1)   | 11 | 9.0 (5.1-15.4)   | 0.019        |
| 39 | <b>Focal neurological findings</b>                                                                                                                                                                                | 24 | 5.0 (3.4-7.4)  | 21 | 5.9 (3.9-8.8)   | 3  | 2.5 (0.8-7.0)    | 0.135        |
| 40 | <b>Found on the floor</b><br>or corresponding place                                                                                                                                                               | 24 | 5.0 (3.4-7.4)  | 24 | 6.7 (4.6-9.8)   | 0  | 0.0 (0.0-3.1)    | 0.003        |
| 41 | <b>General pain</b>                                                                                                                                                                                               | 23 | 4.8 (3.2-7.1)  | 13 | 3.6 (2.1-6.1)   | 10 | 8.2 (4.5-14.4)   | 0.042        |

|    |                                                                                                                                |    |               |    |               |    |                |            |
|----|--------------------------------------------------------------------------------------------------------------------------------|----|---------------|----|---------------|----|----------------|------------|
| 42 | <b>Redness (of skin)</b>                                                                                                       | 22 | 4.6 (3.1-6.9) | 11 | 3.1 (1.7-5.4) | 11 | 9.0 (5.1-15.4) | 0.007      |
| 43 | <b>High CRP</b><br>Taken previous to ED arrival                                                                                | 22 | 4.6 (3.1-6.9) | 13 | 3.6 (2.1-6.1) | 9  | 7.4 (3.9-13.4) | 0.089      |
| 44 | <b>Reduced amount of stool</b>                                                                                                 | 21 | 4.4 (2.9-6.6) | 21 | 5.9 (3.9-8.8) | 0  | 0.0 (0.0-3.1)  | 0.006      |
| 45 | <b>Positive Pasternatsky's sign</b><br>Costovertebral angle tenderness                                                         | 19 | 4.0 (2.6-6.1) | 9  | 2.5 (1.3-4.7) | 10 | 8.2 (4.5-14.4) | 0.012 (F*) |
| 46 | <b>Headache</b>                                                                                                                | 18 | 3.8 (2.4-5.9) | 7  | 2.0 (1.0-4.0) | 11 | 9.0 (5.1-15.4) | 0.001 (F*) |
| 47 | <b>Remained lying or sitting</b><br>Statement of being remained sitting or lying in an abnormal way                            | 18 | 3.8 (2.4-5.9) | 15 | 4.2 (2.6-6.8) | 3  | 2.5 (0.8-7.0)  | 0.582 (F*) |
| 48 | <b>Gastrointestinal bleeding</b><br>Including melena, hematemesis, hematochezia                                                | 18 | 3.8 (2.4-5.9) | 16 | 4.5 (2.8-7.2) | 2  | 1.6 (0.5-5.8)  | 0.267 (F*) |
| 49 | <b>Non-measurable circulatory variables</b>                                                                                    | 18 | 3.8 (2.4-5.9) | 17 | 4.8 (3.0-7.5) | 1  | 0.8 (0.1-5.0)  | 0.053 (F*) |
| 50 | <b>Hypothermia</b><br>Defined as statement hypothermia or "very low temp" or statement temperature <36°                        | 16 | 3.3 (2.1-5.4) | 14 | 3.9 (2.4-6.5) | 2  | 1.6 (0.5-5.8)  | 0.380 (F*) |
| 51 | <b>Irregular pulse</b>                                                                                                         | 16 | 3.3 (2.1-5.4) | 16 | 4.5 (2.8-7.2) | 0  | 0.0 (0.0-3.1)  | 0.016 (F*) |
| 52 | <b>High blood sugar</b><br>Plasma Glucose >12 mmol/L, regardless diabetes or not.                                              | 14 | 2.9 (1.8-4.8) | 14 | 3.9 (2.4-6.5) | 0  | 0.0 (0.0-3.1)  | 0.026 (F*) |
| 53 | <b>Anxiety or fear</b>                                                                                                         | 12 | 2.5 (1.4-4.3) | 8  | 2.2 (1.1-4.4) | 4  | 3.3 (1.3-8.1)  | 0.512 (F*) |
| 54 | <b>Fainting-but now awake</b>                                                                                                  | 12 | 2.5 (1.4-4.3) | 10 | 2.8 (1.5-5.1) | 2  | 1.6 (0.5-5.8)  | 0.739 (F*) |
| 55 | <b>Sweaty</b>                                                                                                                  | 11 | 2.3 (1.3-4.1) | 9  | 2.5 (1.3-4.7) | 2  | 1.6 (0.5-5.8)  | 0.737 (F*) |
| 56 | <b>Dysarthria</b><br>Slurred speech (but non-affected level of consciousness)                                                  | 11 | 2.3 (1.3-4.1) | 9  | 2.5 (1.3-4.7) | 2  | 1.6 (0.5-5.8)  | 0.737 (F*) |
| 57 | <b>Dysfunction of urinary catheters</b><br>Including obstruction/leakage/problematic urinary catheters including nephrostomias | 10 | 2.1 (1.1-3.8) | 8  | 2.2 (1.1-4.4) | 2  | 1.6 (0.5-5.8)  | 1.000 (F*) |
| 58 | <b>Weak pulse or difficulties to palpate the pulse</b>                                                                         | 10 | 2.1 (1.1-3.8) | 10 | 2.8 (1.5-5.1) | 0  | 0.0 (0.0-3.1)  | 0.072 (F*) |

|    |                                                                                                                                                                                                             |    |               |    |               |   |                |                   |
|----|-------------------------------------------------------------------------------------------------------------------------------------------------------------------------------------------------------------|----|---------------|----|---------------|---|----------------|-------------------|
| 59 | <b>Soiled patient</b><br>Patient wetted from his/her own urine or stool                                                                                                                                     | 10 | 2.1 (1.1-3.8) | 10 | 2.8 (1.5-5.1) | 0 | 0.0 (0.0-3.1)  | 0.072 (F*)        |
| 60 | <b>Obstipation</b>                                                                                                                                                                                          | 9  | 1.9 (1.0-3.5) | 0  | 0.0 (0.0-1.1) | 9 | 7.4 (3.9-13.4) | <b>0.000 (F*)</b> |
| 61 | <b>Dizziness</b>                                                                                                                                                                                            | 9  | 1.9 (1.0-3.5) | 6  | 1.7 (0.8-3.6) | 3 | 2.5 (0.8-7.0)  | 0.699 (F*)        |
| 62 | <b>Bloodstained patient</b>                                                                                                                                                                                 | 8  | 1.7 (0.9-3.3) | 6  | 1.7 (0.8-3.6) | 2 | 1.6 (0.5-5.8)  | 1.000 (F*)        |
| 63 | <b>Peripheral coldness</b>                                                                                                                                                                                  | 8  | 1.7 (0.9-3.3) | 8  | 2.2 (1.1-4.4) | 0 | 0.0 (0.0-3.1)  | 0.212 (F*)        |
| 64 | <b>Seizures</b>                                                                                                                                                                                             | 8  | 1.7 (0.9-3.3) | 8  | 2.2 (1.1-4.4) | 0 | 0.0 (0.0-3.1)  | 0.212 (F*)        |
| 65 | <b>High blood pressure</b><br>Statement high blood pressure or statement blood pressure ≥160 mmHg systolic or ≥100 mmHg diastolic                                                                           | 7  | 1.5 (0.7-3.0) | 4  | 1.1 (0.4-2.8) | 3 | 2.5 (0.8-7.0)  | 0.378 (F*)        |
| 66 | <b>Paleness</b>                                                                                                                                                                                             | 7  | 1.5 (0.7-3.0) | 7  | 2.0 (1.0-4.0) | 0 | 0.0 (0.0-3.1)  | 0.199 (F*)        |
| 67 | <b>History of positive findings in blood culture</b><br>Positive blood culture taken previous to EMS arrival-during a visit to the hospital or by other health care provider but the patient is now at home | 6. | 1.3 (0.6-2.7) | 1  | 0.3 (0.1-1.6) | 5 | 4.1 (1.8-9.2)  | 0.005 (F*)        |
| 68 | <b>Throat pain</b>                                                                                                                                                                                          | 5  | 1.0 (0.4-2.4) | 3  | 0.8 (0.3-2.4) | 2 | 1.6 (0.5-5.8)  | 0.605 (F*)        |
| 69 | <b>Mottling</b>                                                                                                                                                                                             | 5  | 1.0 (0.4-2.4) | 5  | 1.4 (0.6-3.2) | 0 | 0.0 (0.0-3.1)  | 0.336 (F*)        |
| 70 | <b>Cyanosis</b><br>Including blue fingers/nails/lips/toes                                                                                                                                                   | 4  | 0.8 (0.3-2.1) | 4  | 1.1 (0.4-2.8) | 0 | 0.0 (0.0-3.1)  | 0.576 (F*)        |
| 71 | <b>Obstructive breathing</b>                                                                                                                                                                                | 4  | 0.8 (0.3-2.1) | 4  | 1.1 (0.4-2.8) | 0 | 0.0 (0.0-3.1)  | 0.576 (F*)        |
| 72 | <b>Bruises or peteckiae</b>                                                                                                                                                                                 | 4  | 0.8 (0.3-2.1) | 4  | 1.1 (0.4-2.8) | 0 | 0.0 (0.0-3.1)  | 0.576 (F*)        |
| 73 | <b>Rash (on skin)</b>                                                                                                                                                                                       | 3  | 0.6 (0.2-1.8) | 0  | 0.0 (0.0-1.1) | 3 | 2.5 (0.8-7.0)  | 0.016 (F*)        |
| 74 | <b>Dry mucous membranes (of the mouth)</b>                                                                                                                                                                  | 3  | 0.6 (0.2-1.8) | 3  | 0.8 (0.3-2.4) | 0 | 0.0 (0.0-3.1)  | 0.575 (F*)        |
| 75 | <b>Wound pain</b>                                                                                                                                                                                           | 2  | 0.4 (0.1-1.5) | 0  | 0.0 (0.0-1.1) | 2 | 1.6 (0.5-5.8)  | 0.064 (F*)        |
| 76 | <b>Photosensitivity</b>                                                                                                                                                                                     | 2  | 0.4 (0.1-1.5) | 0  | 0.0 (0.0-1.1) | 2 | 1.6 (0.5-5.8)  | 0.064 (F*)        |
| 77 | <b>Blisters (on skin)</b>                                                                                                                                                                                   | 2  | 0.4 (0.1-1.5) | 0  | 0.0 (0.0-1.1) | 2 | 1.6 (0.5-5.8)  | 0.064 (F*)        |
| 78 | <b>Pale stool</b>                                                                                                                                                                                           | 2  | 0.4 (0.1-1.5) | 0  | 0.0 (0.0-1.1) | 2 | 1.6 (0.5-5.8)  | 0.064 (F*)        |

|    |                                                                                                                                                                                |   |               |   |               |   |               |            |
|----|--------------------------------------------------------------------------------------------------------------------------------------------------------------------------------|---|---------------|---|---------------|---|---------------|------------|
| 79 | <b>Chronically compromised breathing</b><br>Such as painful conditions or neurological diseases compromising breathing                                                         | 2 | 0.4 (0.1-1.5) | 1 | 0.3 (0.1-1.6) | 1 | 0.8 (0.1-5.0) | 0.445 (F*) |
| 80 | <b>Non-measurable breathing variables</b>                                                                                                                                      | 2 | 0.4 (0.1-1.5) | 2 | 0.6 (0.2-2.0) | 0 | 0.0 (0.0-3.1) | 1.000 (F*) |
| 81 | <b>Icterus</b>                                                                                                                                                                 | 2 | 0.4 (0.1-1.5) | 2 | 0.6 (0.2-2.0) | 0 | 0.0 (0.0-3.1) | 1.000 (F*) |
| 82 | <b>Decreased miscellaneous mobility</b><br>Including expressions such as stiffness when trying to move arms, disability to sit or disability to squeeze the investigators hand | 2 | 0.4 (0.1-1.5) | 2 | 0.6 (0.2-2.0) | 0 | 0.0 (0.0-3.1) | 1.000 (F*) |
| 83 | <b>Cardiac arrest</b>                                                                                                                                                          | 2 | 0.4 (0.1-1.5) | 2 | 0.6 (0.2-2.0) | 0 | 0.0 (0.0-3.1) | 1.000 (F*) |
| 84 | <b>Sensitivity to sound</b>                                                                                                                                                    | 1 | 0.2 (0.0-1.2) | 0 | 0.0 (0.0-1.1) | 1 | 0.8 (0.1-5.0) | 0.255 (F*) |
| 85 | <b>Change of skin turgor</b>                                                                                                                                                   | 1 | 0.2 (0.0-1.2) | 1 | 0.3 (0.1-1.6) | 0 | 0.0 (0.0-3.1) | 1.000 (F*) |
| 86 | <b>Exuding skin</b>                                                                                                                                                            | 1 | 0.2 (0.0-1.2) | 1 | 0.3 (0.1-1.6) | 0 | 0.0 (0.0-3.1) | 1.000 (F*) |
| 87 | <b>Prolonged capillary refill time</b>                                                                                                                                         | 1 | 0.2 (0.0-1.2) | 1 | 0.3 (0.1-1.6) | 0 | 0.0 (0.0-3.1) | 1.000 (F*) |
| 88 | <b>Painful muscle cramp</b>                                                                                                                                                    | 1 | 0.2 (0.0-1.2) | 1 | 0.3 (0.1-1.6) | 0 | 0.0 (0.0-3.1) | 1.000 (F*) |
| 89 | <b>Palpitations</b>                                                                                                                                                            | 1 | 0.2 (0.0-1.2) | 1 | 0.3 (0.1-1.6) | 0 | 0.0 (0.0-3.1) | 1.000 (F*) |
| 90 | <b>Feeling of depression</b>                                                                                                                                                   | 0 | 0.0 (0.0-0.8) | 0 | 0.0 (0.0-1.1) | 0 | 0.0 (0.0-3.1) | -          |

EMS= Emergency Medical Services, CI=Confidence Interval, IV= Intravenous, CRP= C-Reactive Protein

\*for comparison between EMS and non-EMS patients. P-values are presented without adjustment for multiple comparisons. In total 90 tests were performed. Bonferroni-adjusted significance level is  $0,05/90=0,00056$ . P-values indicating significant differences after adjustment for multiple comparisons by Bonferroni correction are bolded and considered significant in the current study.

F\* Fischer's exact test was used for statistical analysis due to expected count being <5.

*References:*

1. Wallgren UM, Bohm KEM, Kurland L. Presentations of adult septic patients in the prehospital setting as recorded by emergency medical services: a mixed methods analysis. Scand J Trauma Resusc Emerg Med. 2017;25(1):23.
